# Supplementary material for: On-line monitoring of a recirculating-flow fluorescent capillary system for exploring the interaction mechanism of carbon dots/metal ions
Source: Royal Society of Chemistry journal article supplement (doi:10.1039/d3ay00256j), 2023-01-01
Supplement: d3ay00256j1.pdf [file d3ay00256j1.pdf]

## Electronic Supplementary Information (ESI)

### On-line monitoring of the recirculating-flow fluorescent capillary system for exploring the interaction mechanism of carbon dots/metal ions

Ya-Xiong Luo,<sup>a</sup> Qiao-Jing Li,<sup>b</sup> Yong-Sheng Li,<sup>c\*</sup> and Xiu-Feng Gao<sup>a\*</sup>

a. West China School of Basic Medical Sciences & Forensic Medicine, Sichuan University, Chengdu, 610065, China.

b. Department of Chemistry, School of Science, The University of Tokyo, Japan.

c. School of Chemical Engineering, Sichuan University, Chengdu, 6100651, China.

\* Corresponding author: E-mail: lysgxf2005@qq.com; xiufengg@163.com; Tel: +86 136-8909-1550
